# Supplementary material
Source: PubMed Central journal article supplement (PMC5518876)
Supplement: cr201758x1.pdf [file cr201758x1.pdf]

**Supplemental Tables:**

**Table S1. *In vitro* and *in vivo* Development of Two-cell Embryos after Injection of Cre mRNA into One Blastomere\*.**

| Condition       | Cre mRNA Concentration (ng/ $\mu$ l) | Injected Two-cell Embryos | Blastocysts | mT <sup>+</sup> /mG <sup>+</sup> Blastocysts | Transferred Embryos (Recipients) | Offspring | mT <sup>+</sup> /mG <sup>+</sup> Offspring |
|-----------------|--------------------------------------|---------------------------|-------------|----------------------------------------------|----------------------------------|-----------|--------------------------------------------|
| <i>In vitro</i> | 100                                  | 24                        | 4           | 1                                            | -                                | -         | -                                          |
|                 | 50                                   | 20                        | 5           | 3                                            | -                                | -         | -                                          |
|                 | 2.5                                  | 91                        | 85          | 45                                           | -                                | -         | -                                          |
|                 | 0.5                                  | 48                        | 46          | 20                                           | -                                | -         | -                                          |
| <i>In vivo</i>  | 2.5                                  | 110                       | -           | -                                            | 102 (4)                          | -         | 10 <sup>a</sup>                            |
|                 | 2.5                                  | 129                       | -           | -                                            | 120 (4)                          | 29        | 10                                         |

\*: Heterozygous *mT/mG* male mice were used for mating.

<sup>a</sup>: analyzed before birth
