# Supplementary material
Source: PubMed Central journal article supplement (PMC5518876)
Supplement: cr201758x4.pdf [file cr201758x4.pdf]

**Table S4. Off-target Analysis in Chimeric Mice Carrying *Tet3* Mutation Generated Using Multiple sgRNAs.**

| Targeted Sites and Sequences                                                                      | Potential Off-target Sites | Sequences                   | # Mismatches | Gene          | Mice Analyzed | Indel Mutation |
|---------------------------------------------------------------------------------------------------|----------------------------|-----------------------------|--------------|---------------|---------------|----------------|
| <b><i>Tet3</i></b><br><b>sgRNA I:</b><br>chr6:8332<br>6943<br>GATCCG<br>AAGACA<br>CACACT<br>GGAGG | chr16:<br>46195148         | GATTGGAAGACA<br>CACACTGGAAG | 2            | None          | #1<br>#2      | No<br>No       |
|                                                                                                   | chr9:<br>42103641          | GAGCAGAAGTCA<br>CACACTGGAAG | 3            | None          | #1<br>#2      | No<br>No       |
|                                                                                                   | chr4:<br>64835212          | GAGAGGAAGACA<br>CACACTGGAAG | 3            | None          | #1<br>#2      | No<br>No       |
|                                                                                                   | chr14:<br>10557060         | AATGAGAGGACA<br>CACACTGGCAG | 4            | None          | #1<br>#2      | No<br>No       |
|                                                                                                   | chr15:<br>42620594         | CTTCTGATGACA<br>CACACTGGAAG | 4            | None          | #1<br>#2      | No<br>No       |
|                                                                                                   | chr9:<br>86474035          | GGTGTGATGACA<br>CACACTGGTGG | 4            | None          | #1<br>#2      | No<br>No       |
|                                                                                                   | chr16:<br>63674533         | CAAATGAAGACA<br>CACACTGGAGG | 4            | None          | #1<br>#2      | No<br>No       |
|                                                                                                   | chr11:<br>62528730         | ATCCCGAAGGCA<br>CACACTGGCGG | 4            | NM_1<br>33208 | #1<br>#2      | No<br>No       |
|                                                                                                   | chr13:<br>38338129         | GAGGAGAAGCCA<br>CACACTGGAGG | 4            | None          | #1<br>#2      | No<br>No       |
|                                                                                                   | chr8:<br>64211120          | GATCTGAAGACA<br>CGCACTGGGAG | 2            | None          | #1<br>#2      | No<br>No       |
| <b><i>Tet3</i></b><br><b>sgRNA J:</b><br>chr6:8332<br>6859<br>TATCTT<br>GATCCT<br>GGCCTG<br>GGAGG | chr6:<br>35941554          | TATATTGATCCTG<br>GGCTGGGAAG | 2            | None          | #1<br>#2      | No<br>No       |
|                                                                                                   | chr4:<br>90717885          | TAGCTTGGTGCT<br>GGCCTGGGAGG | 3            | None          | #1<br>#2      | No<br>No       |
|                                                                                                   | chr19:<br>48738260         | GATCTTGATCCTG<br>TCCTGGGTGG | 2            | None          | #1<br>#2      | No<br>Yes      |
|                                                                                                   | chr13:<br>93576786         | TAGCCTCATCCTG<br>GCCTGGGAAG | 3            | None          | #1<br>#2      | No<br>No       |
|                                                                                                   | chr11:<br>78781986         | AATGTTGACCCT<br>GGCCTGGGAGG | 3            | None          | #1<br>#2      | No<br>No       |
|                                                                                                   | chr6:<br>50178847          | TCTCTGTTCCTG<br>GCCTGGCTAG  | 3            | None          | #1<br>#2      | No<br>No       |
|                                                                                                   | chr1:<br>134169672         | CATCTTGATGCTG<br>GCCTGGTGGG | 3            | None          | #1<br>#2      | No<br>No       |
|                                                                                                   | chr14:<br>                 | GGCCTGTTCCTG                | 4            | None          | #1            | No             |

|                                                                                     |                     |                             |   |      |          |          |
|-------------------------------------------------------------------------------------|---------------------|-----------------------------|---|------|----------|----------|
|                                                                                     | 35010490            | GCCTGGGTGG                  |   |      | #2       | No       |
|                                                                                     | chr7:<br>46969057   | GTGCCTGATCCT<br>GGCCTGGGTAG | 4 | None | #1<br>#2 | No<br>No |
|                                                                                     | chr17:<br>69117892  | TGTCTCCATCCTG<br>GCCTGGGAGG | 3 | None | #1<br>#2 | No<br>No |
| <b>Tet3</b><br>sgRNA K:<br>chr6:8332<br>6795<br>ACTGAT<br>ACCCTC<br>CGGAAG<br>TATGG | chr9:<br>99961473   | GCTGATGACTTC<br>CGGAAGTACGG | 4 | None | #1<br>#2 | No<br>No |
|                                                                                     | chr9:<br>67310159   | CCTGACACCCTC<br>CGGAAGGACAG | 3 | None | #1<br>#2 | No<br>No |
|                                                                                     | chr4:<br>65615895   | ACTGTTACTCTCA<br>GGAAGTAGAG | 3 | None | #1<br>#2 | No<br>No |
|                                                                                     | chr11:<br>96515446  | ACTGATAACCAC<br>GGGAAGTAGAG | 3 | None | #1<br>#2 | No<br>No |
|                                                                                     | chr5:<br>94352437   | AGTAAAACCCTC<br>TGGAAGTAAAG | 4 | None | #1<br>#2 | No<br>No |
|                                                                                     | chr5:<br>94493859   | AGTAAGACCCTC<br>TGGAAGTAAAG | 4 | None | #1<br>#2 | No<br>No |
|                                                                                     | chr5:<br>94730178   | AGTAAAACCCTC<br>TGGAAGTAAAG | 4 | None | #1<br>#2 | No<br>No |
|                                                                                     | chr5:<br>94861489   | AGTAAGACCCTC<br>TGGAAGTAAAG | 4 | None | #1<br>#2 | No<br>No |
|                                                                                     | chr5:<br>95039728   | AGTAAAACCCTC<br>TGGAAGTAAAG | 4 | None | #1<br>#2 | No<br>No |
|                                                                                     | chr5:<br>95378733   | AGTAAAACCCTC<br>TGGAAGTAAAG | 4 | None | #1<br>#2 | No<br>No |
| <b>Tet3</b><br>sgRNA L:<br>chr6:<br>83326734<br>ATGTAT<br>TGGAGT<br>GGTGA<br>GGTGG  | chr19:<br>14377056  | ATGTCTTGGAGT<br>GGTGGAGGAGG | 1 | None | #1<br>#2 | No<br>No |
|                                                                                     | chr11:<br>98084248  | CTGTTTTGCAGTG<br>GTGGAGGTGG | 3 | None | #1<br>#2 | No<br>No |
|                                                                                     | chr6:<br>95018535   | TTGTATTACAGTG<br>GTGGAGGTGG | 3 | None | #1<br>#2 | No<br>No |
|                                                                                     | chr11:<br>104276220 | TTATATTGGAAT<br>GGTGGAGGTGG | 3 | None | #1<br>#2 | No<br>No |
|                                                                                     | chr4:<br>102728012  | ATATTTTGTAGTG<br>GTGGAGGAGG | 3 | None | #1<br>#2 | No<br>No |
|                                                                                     | chr4:<br>149725830  | ACTTAATGGAGT<br>GGTGGAGGAGG | 3 | None | #1<br>#2 | No<br>No |
|                                                                                     | chr16:<br>25707136  | ATGTTATGGTGT<br>GGTGGAGGAGG | 3 | None | #1<br>#2 | No<br>No |
|                                                                                     | chr4:<br>93910730   | ATGTATTGGGGT<br>GGTGGTGGTGG | 2 | None | #1<br>#2 | No<br>No |

|  |                    |                             |   |      |    |    |
|--|--------------------|-----------------------------|---|------|----|----|
|  | chr5:<br>101882412 | ACACATTTGAGT<br>GGTGGAGGTGG | 4 | None | #1 | No |
|  |                    |                             |   |      | #2 | No |
|  | chr14:<br>66565885 | TAGGATTGGTGT<br>GGTGGAGGTGG | 4 | None | #1 | No |
|  |                    |                             |   |      | #2 | No |
