# Supplementary material
Source: PubMed Central journal article supplement (PMC5518876)
Supplement: cr201758x10.pdf [file cr201758x10.pdf]

Figure S6

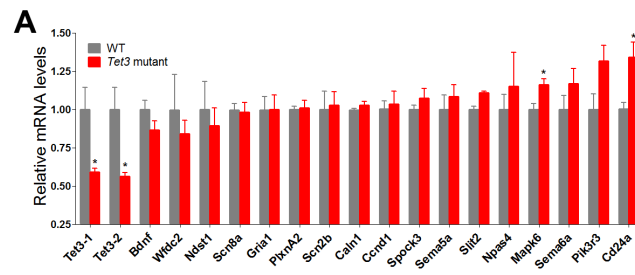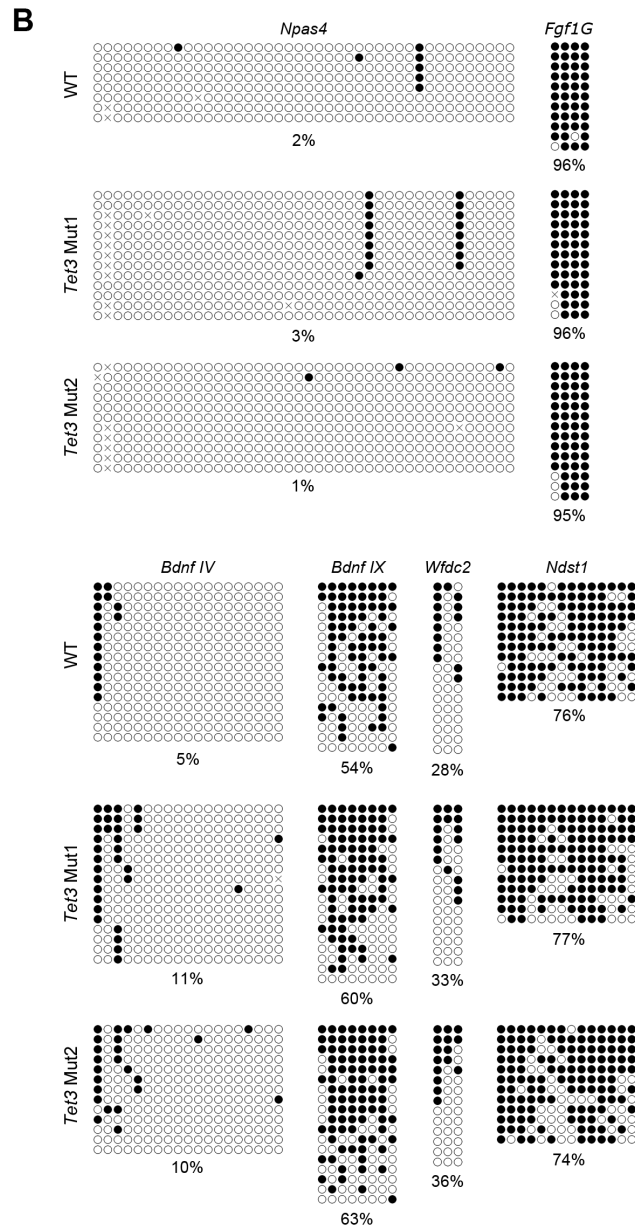

**Figure S6. Gene Expression And Local Methylation Analysis of Candidate Target Genes in *Tet3* Mutant Chimeric Mice.**

(A) Relative gene expression levels (normalized to GAPDH) in WT or chimeric *Tet3* mutant cortices (with over 50% chimerism). Two pairs of *Tet3* primers were used to confirm that the *Tet3* deletion was successful. *Mapk6* and *Cd24a* showed significant changes after *Tet3* mutation. n=3-5 for both WT and *Tet3* mutant chimeras. Data are presented as mean  $\pm$  s.e.m., unpaired *t*-test.

(B) Methylation analysis of *Npas4*, *Fgf1G*, *Bdnf IV*, *Bdnf IX*, *Wfdc2* and *Ndst1* by bisulfite Sanger sequencing. The black and open circles represent the methylated and unmethylated CpG sites respectively. Slightly increased CpG methylation at the *Bdnf* promoter *IV*, *IX* and *Wfdc2* promoter regions, but not the *Npas4* promoter-exon 1 junction, the *Fgf1G* and *Ndst1* promoter regions, was observed in *Tet3* mutant chimeras.
